# Supplementary material for: Silver Nanoparticle Arrays onto Glass Substrates Obtained by Solid-State Thermal Dewetting: A Morphological, Structural and Surface Chemical Study
Source: MDPI journal article supplement (doi:10.3390/nano12040617), 2022-02-11
Supplement: s1 [file s1]

# SUPPORTING INFORMATION

## **Silver Nanoparticle Arrays onto Glass Substrates Obtained by Solid-State Thermal Dewetting: A Morphological, Structural and Surface Chemical Study**

**Juan Agustín Badán<sup>1</sup>, Elena Navarrete-Astorga<sup>2</sup>, Rodrigo Henríquez<sup>3</sup>, Francisco Martín Jiménez<sup>2</sup>, Daniel Ariosa<sup>1</sup>, José Ramón Ramos-Barrado<sup>2</sup> and Enrique A. Dalchiele<sup>1,\*</sup>.**

<sup>1</sup> Instituto de Física, Facultad de Ingeniería, Universidad de la República, Julio Herrera y Reissig 565, C.C. 30, 11000 Montevideo, Uruguay; abadan@fing.edu.uy; dariosa@fing.edu.uy; dalchiel@fing.edu.uy

<sup>2</sup> Laboratorio de Materiales y Superficies (Unidad Asociada al CSIC). Departamentos de Física Aplicada & Ing. Química, Universidad de Málaga, E29071 Málaga, Spain; enavarrete@uma.es; marjim@uma.es; barrado@uma.es

<sup>3</sup> Instituto de Química, Facultad de Ciencias, Pontificia Universidad Católica de Valparaíso, Av. Brasil, 2950, Valparaíso, Chile; rodrigo.henriquez@pucv.cl

\* Correspondence: dalchiel@fing.edu.uy ; Tel.: (+598 27142714)

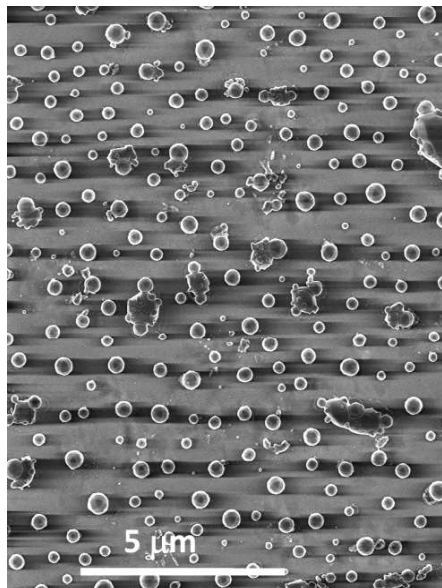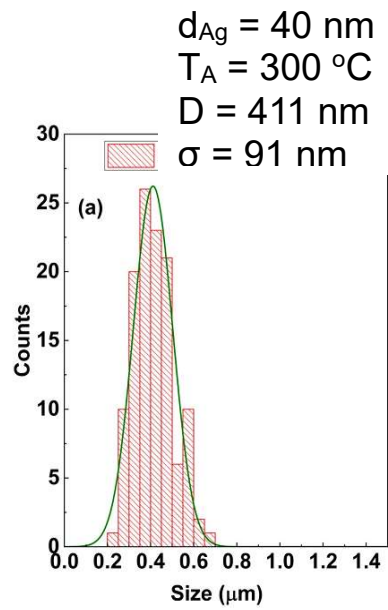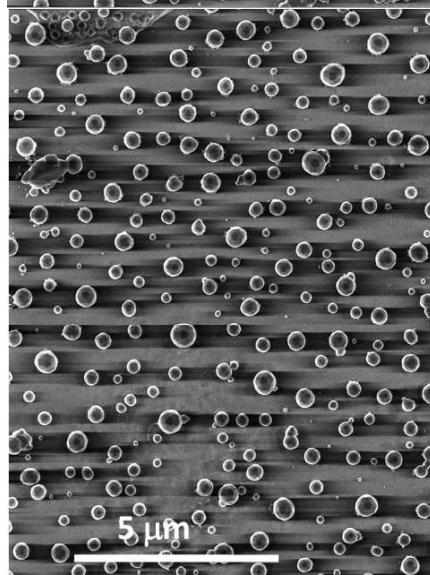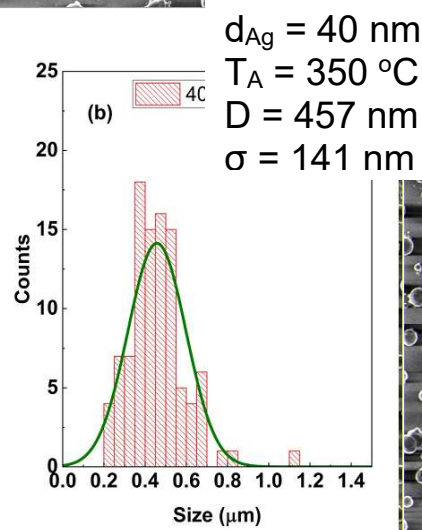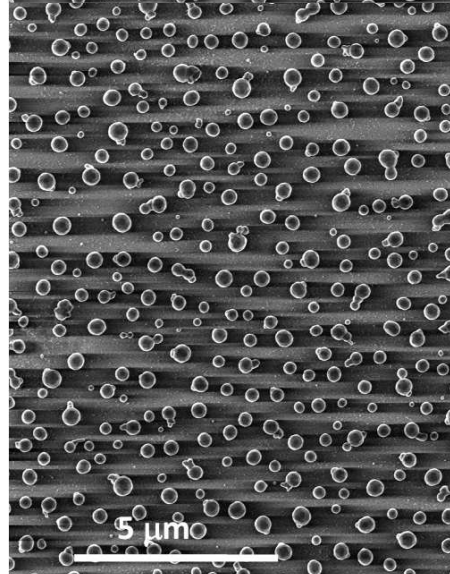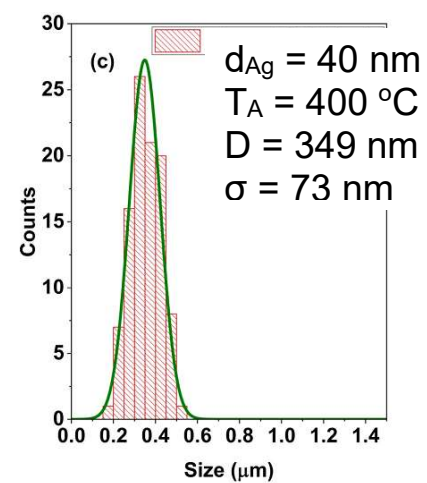

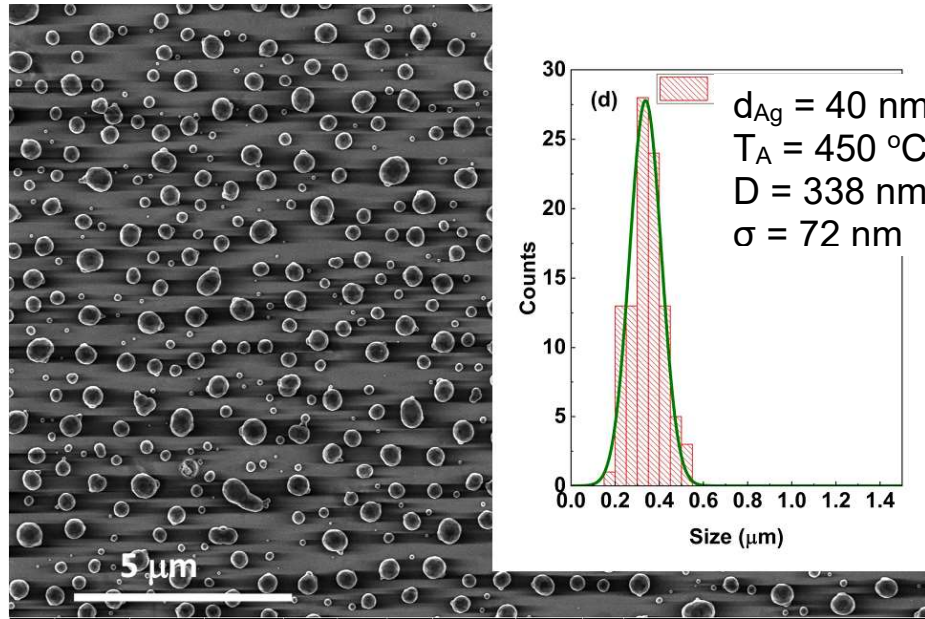

**Figure S1.** FE-SEM micrographs and silver nanoparticle size distribution histograms for vacuum thermal evaporated silver layers with a nominal thickness  $d_{\text{Ag}} = 40 \text{ nm}$  at different stages of the annealing step of the SSD process by applying the heat-up region program depicted in Figure 1 and ending at different  $T_{\text{A}}$  values as indicated. The mean size  $D$  of the formed silver nanoparticles and standard deviation  $\sigma$  of the size distribution are indicated.

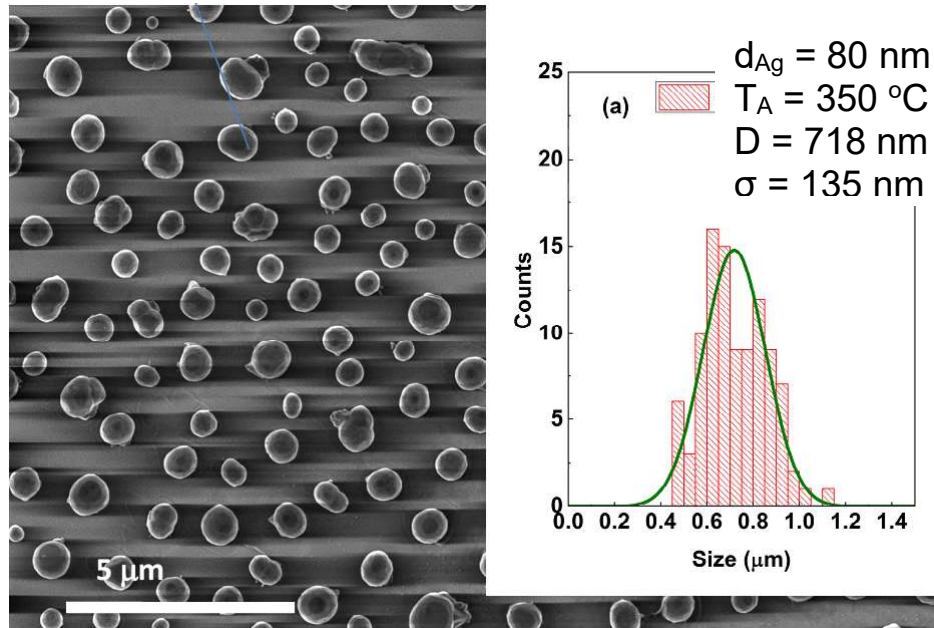

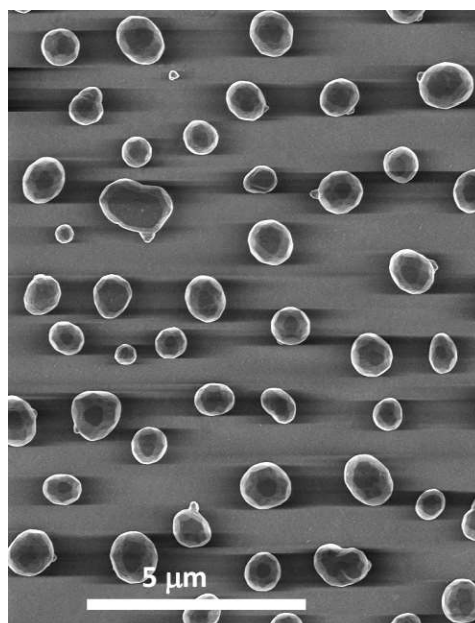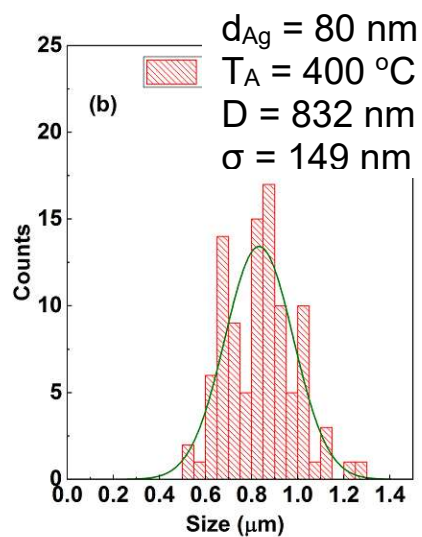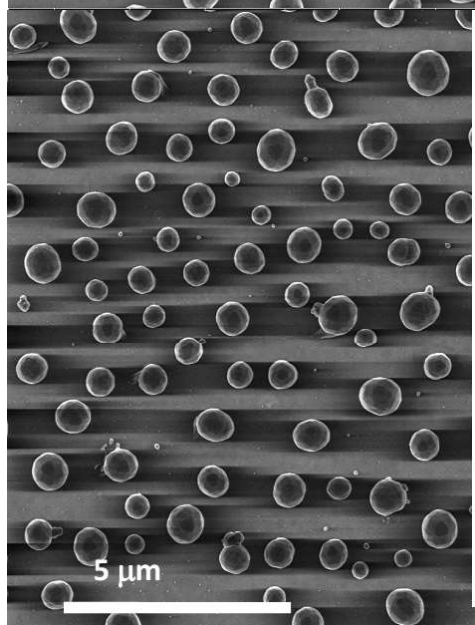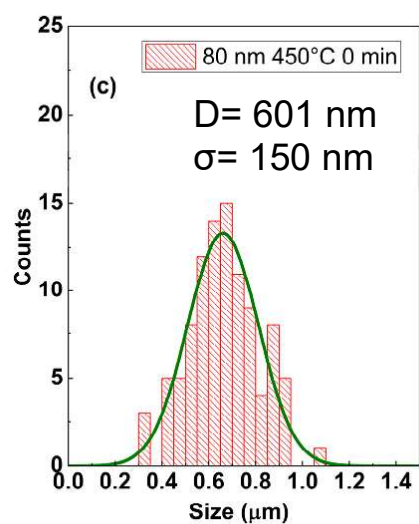

$d_{\text{Ag}} = 80 \text{ nm}$   
 $T_A = 450 \text{ }^\circ\text{C}$   
 $D = 601 \text{ nm}$   
 $\sigma = 150 \text{ nm}$



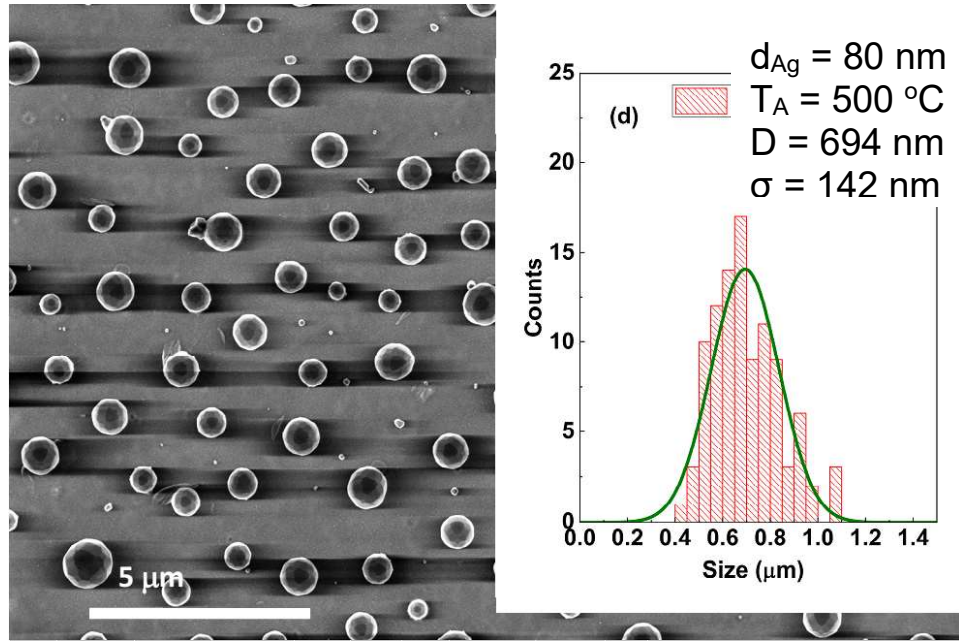

**Figure S2.** FE-SEM micrographs and silver nanoparticle size distribution histograms for vacuum thermal evaporated silver layers with a nominal thickness  $d_{\text{Ag}} = 80 \text{ nm}$  at different stages of the annealing step of the SSD process by applying the heat-up region program depicted in Figure 1 and ending at different  $T_{\text{A}}$  values as indicated. The mean size  $D$  of the formed silver nanoparticles and standard deviation  $\sigma$  of the size distribution are indicated.

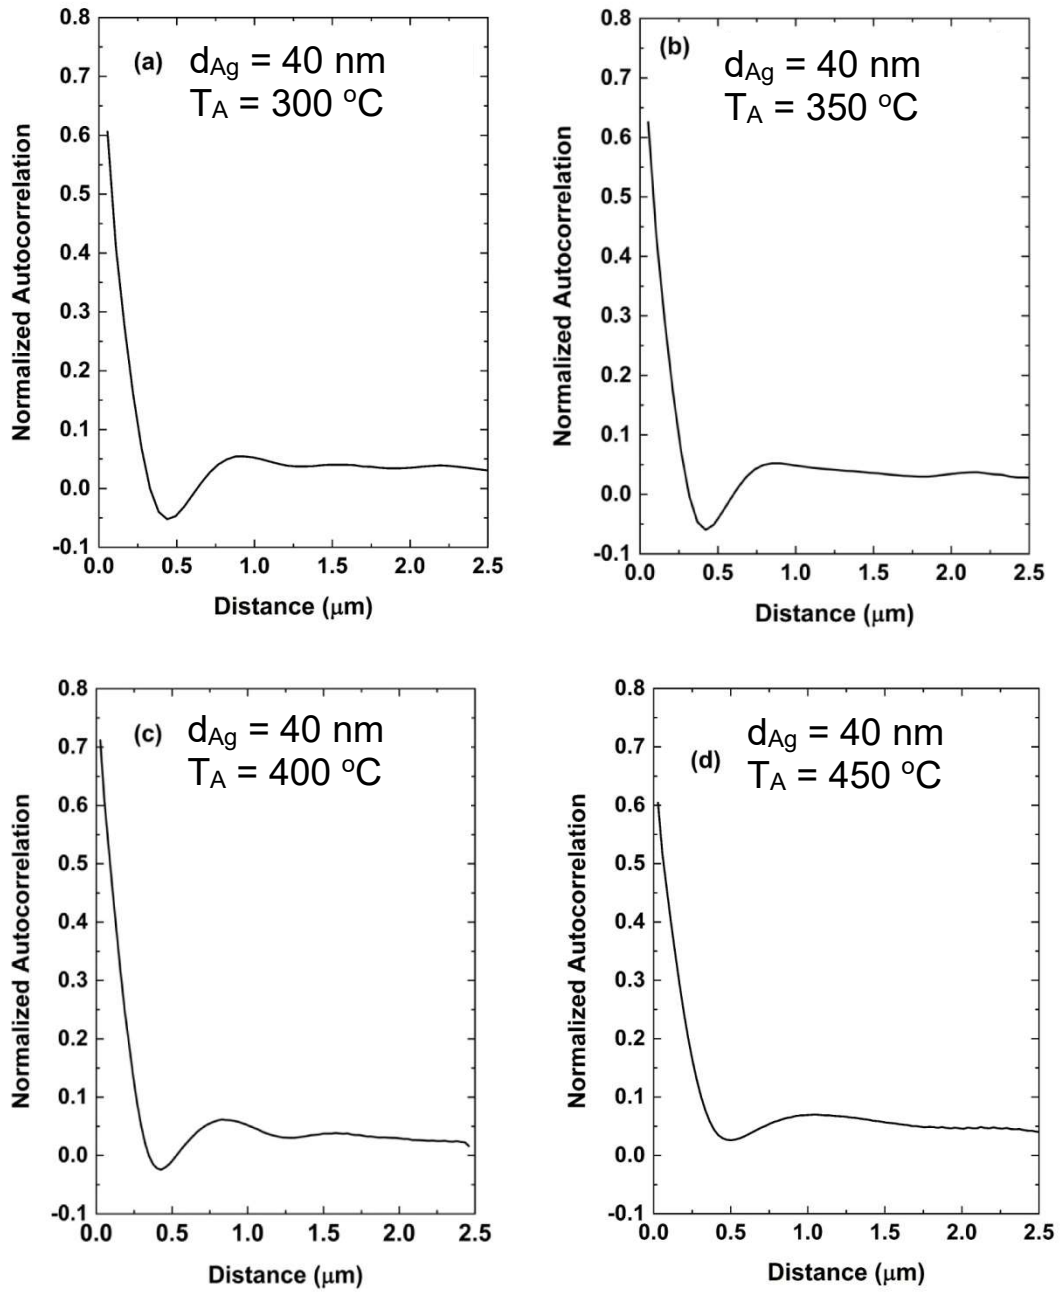

**Figure S3.** Typical normalized measured radially averaged autocorrelation function,  $g(r)$ , for the silver nanoparticle positions for typical samples with  $d_{Ag} = 40$  nm and different  $T_A$  values as indicated.

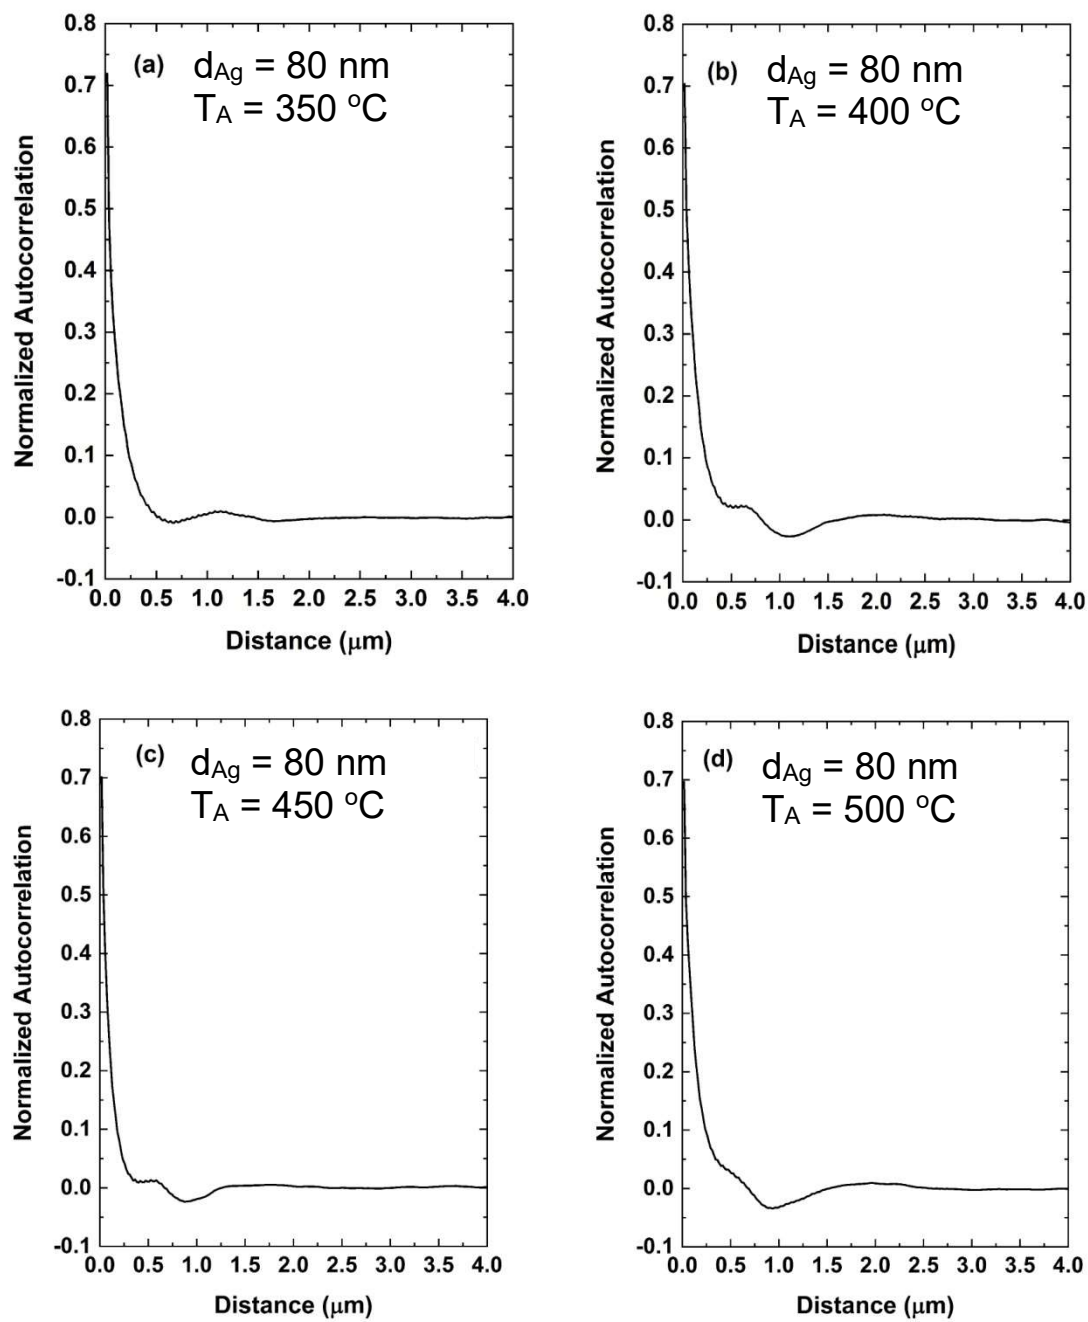

**Figure S4.** Typical normalized measured radially averaged autocorrelation function,  $g(r)$ , for the silver nanoparticle positions for typical samples with  $d_{\text{Ag}} = 80 \text{ nm}$  and different  $T_{\text{A}}$  values as indicated.

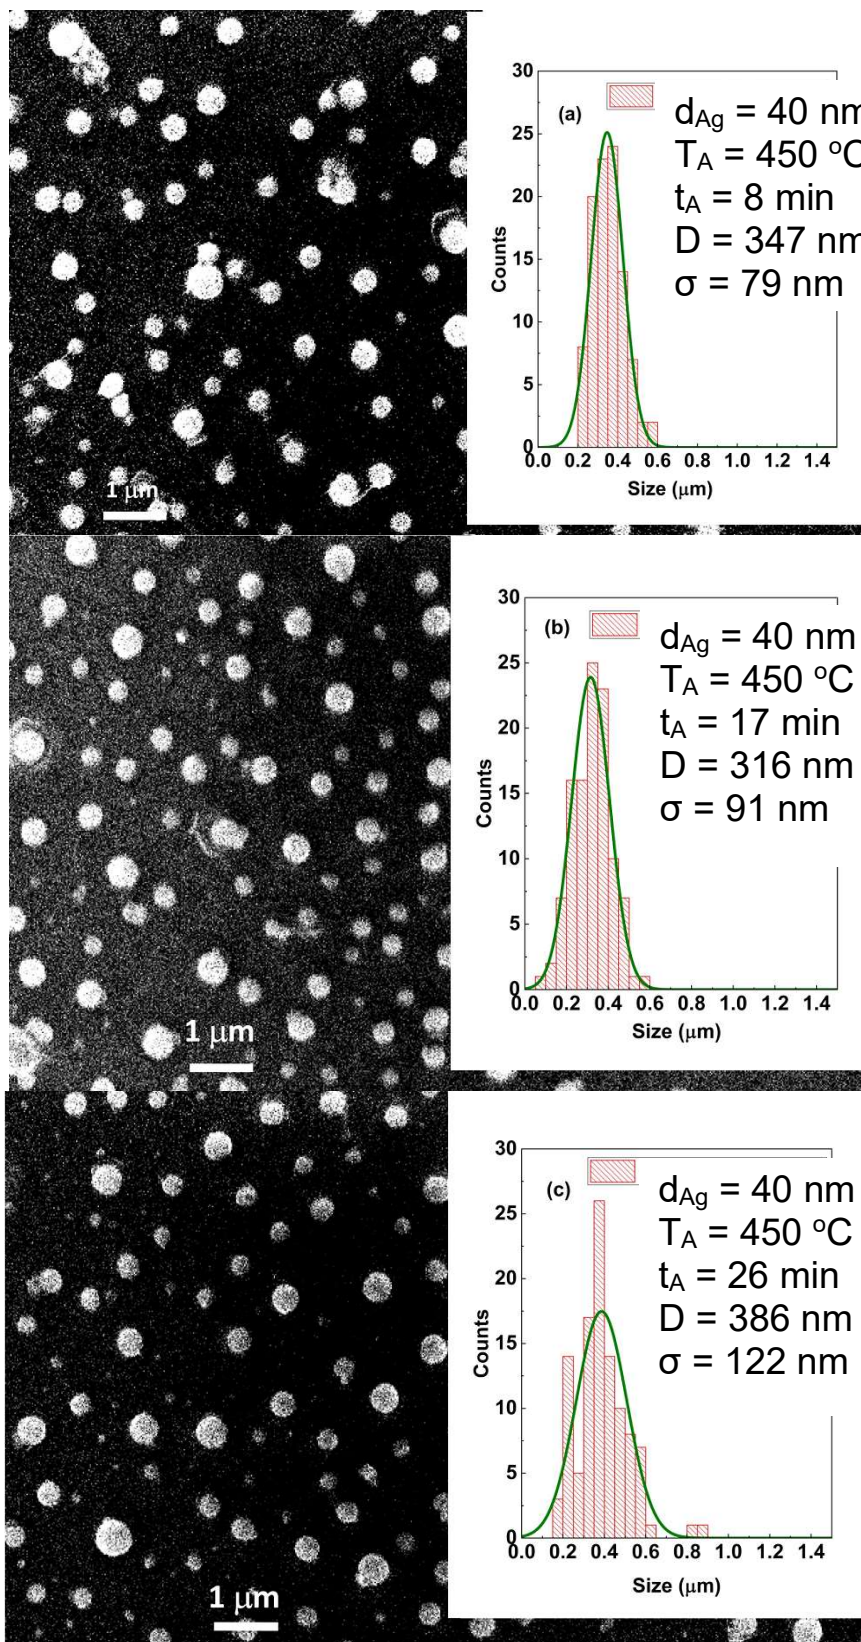



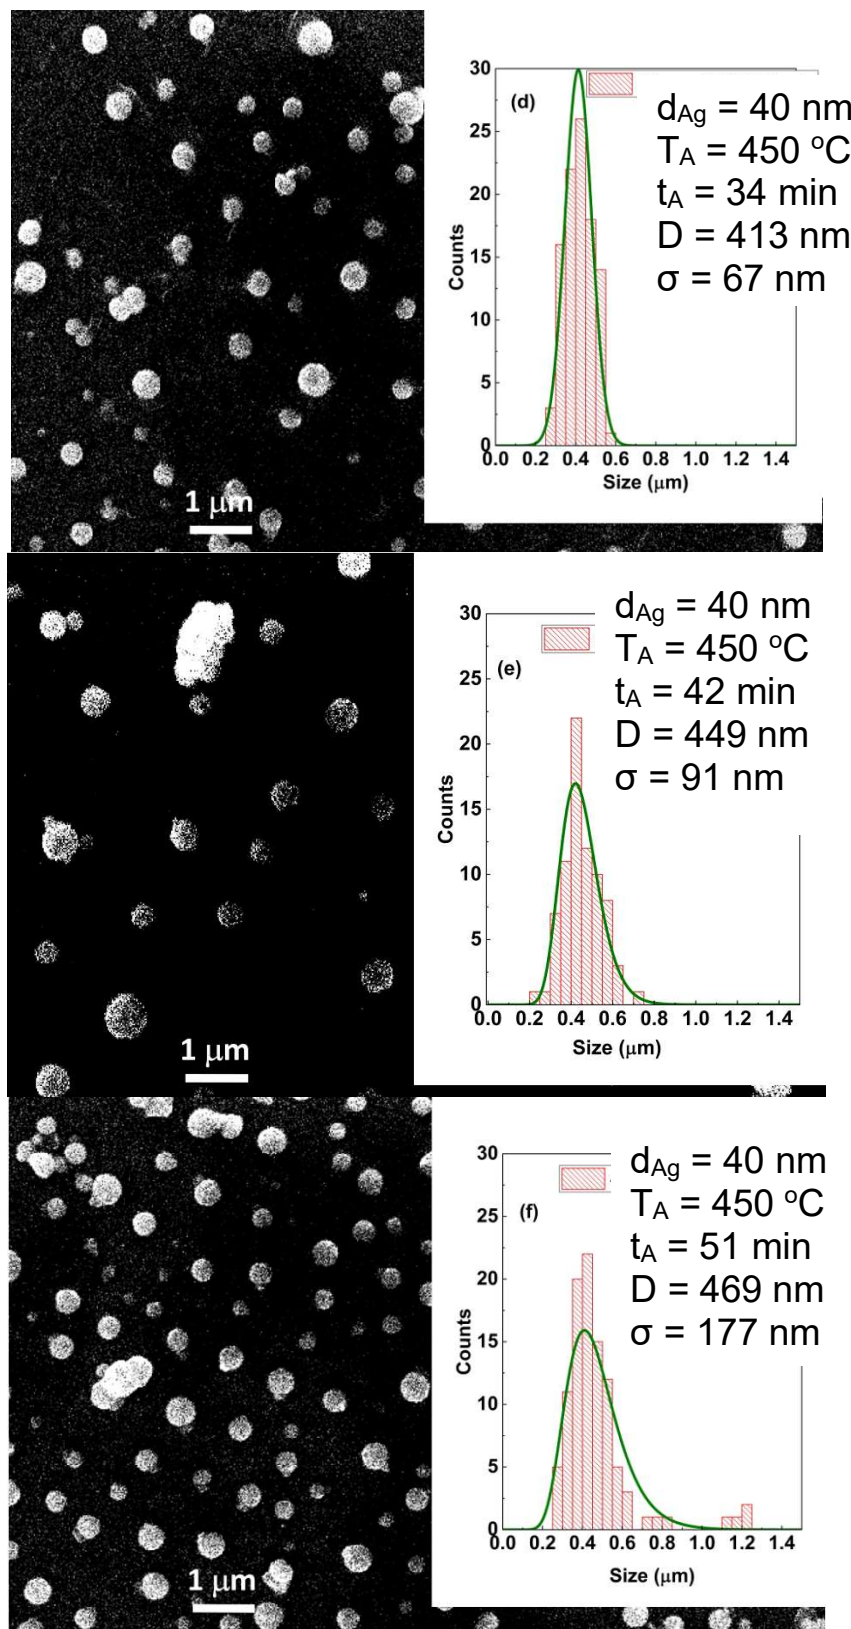

**Figure S5.** FE-SEM micrograph top views and silver nanoparticle size distribution histograms of vacuum thermal evaporated silver layers with a nominal thickness  $d_{\text{Ag}} = 40$  nm at different stages of the annealing step of the SSD process by applying the constant temperature region program depicted in Figure 1 at  $T_{\text{A}} = 450$   $^{\circ}\text{C}$  and ending at different  $t_{\text{A}}$  values as indicated. The mean size  $D$  of the formed silver nanoparticles and standard deviation  $\sigma$  of the size distribution are indicated.

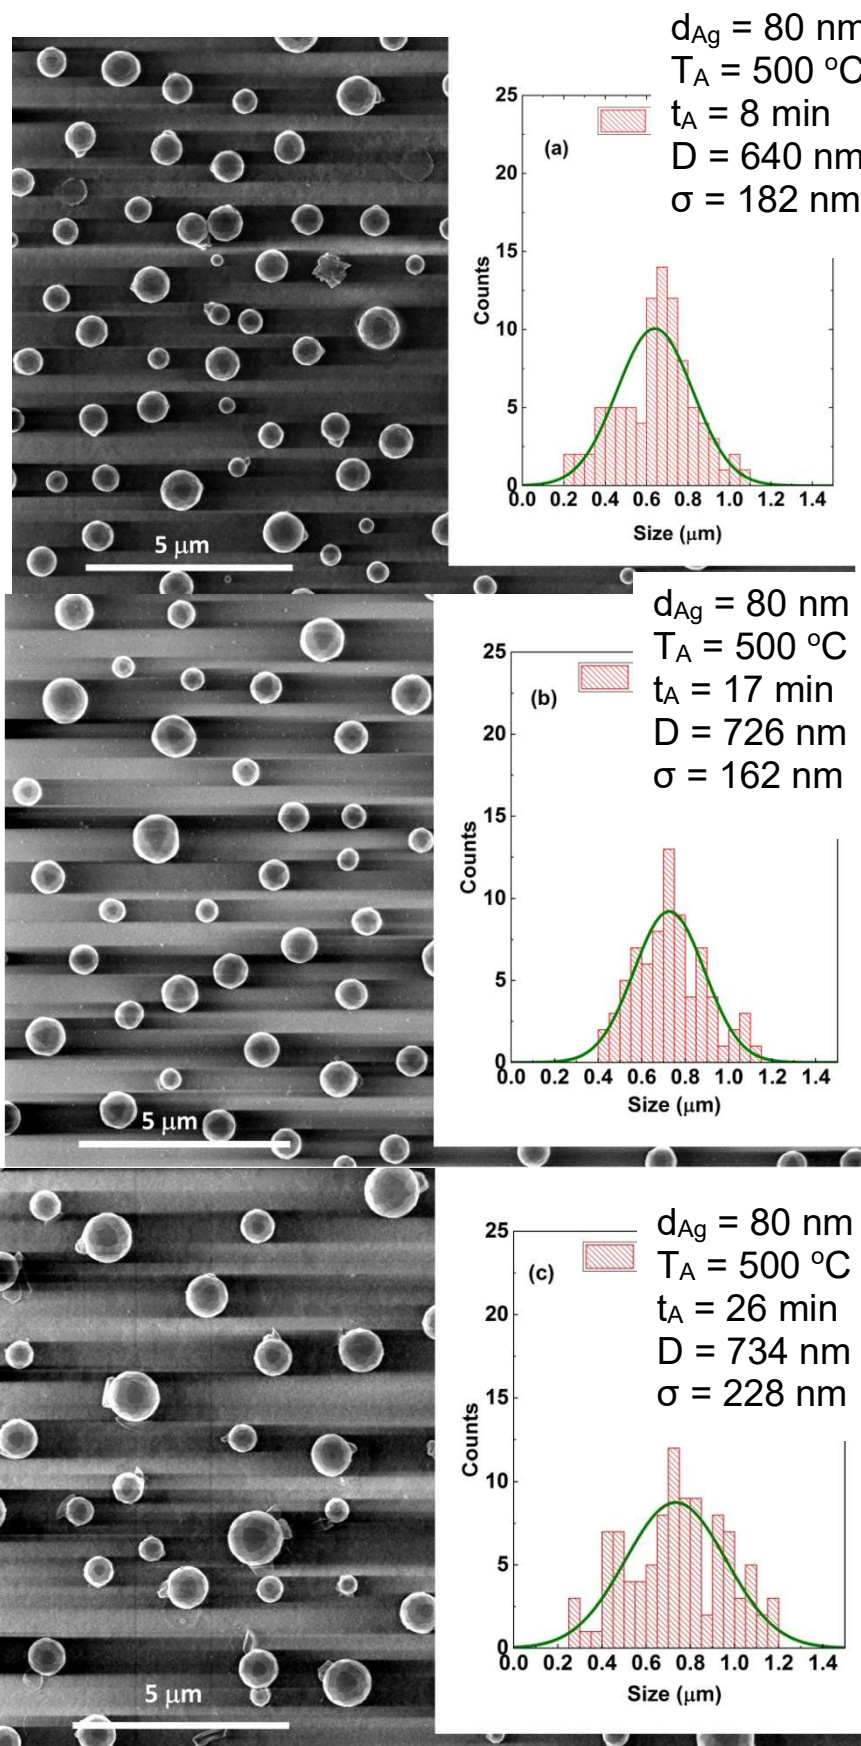

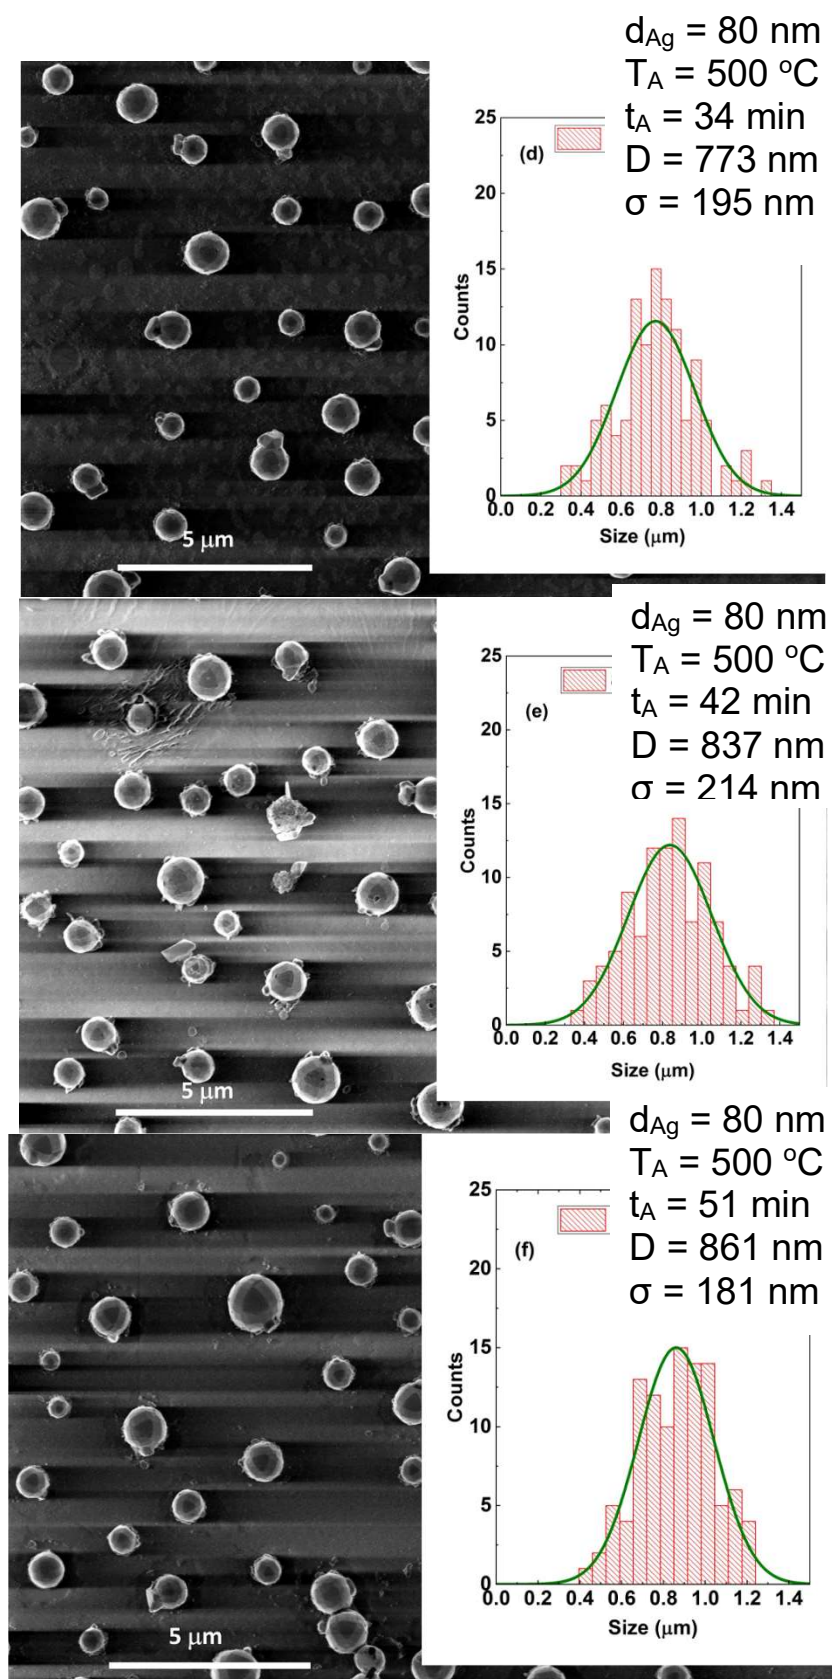

**Figure S6.** FE-SEM micrograph top views and silver nanoparticle size distribution histograms of vacuum thermal evaporated silver layers with a nominal thickness  $d_{Ag}=80 \text{ nm}$  at different stages of the annealing step of the SSD process by applying the constant temperature region program depicted in Figure 1 at

$T_A=500^\circ\text{C}$  and ending at different  $t_A$  values as indicated. The mean size  $D$  of the formed silver nanoparticles and standard deviation  $\sigma$  of the size distribution are indicated.

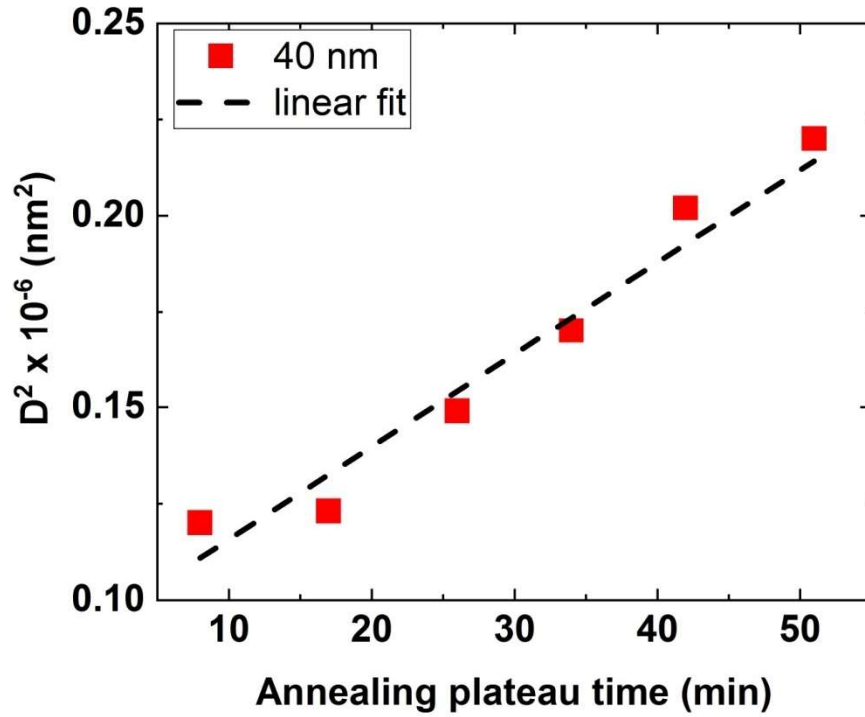

**Figure S7.** Plot of silver nanoparticle average size ( $D$ ) square as a function of the annealing time  $t_A$  of the annealing step of the SSD process. The dashed black line corresponds to the linear fitting. SSD process for silver vacuum thermal evaporated layers with a nominal thickness  $d_{Ag}=40$  nm by applying the constant temperature region program depicted in Fig. 1 at  $T_A=450^\circ\text{C}$ .



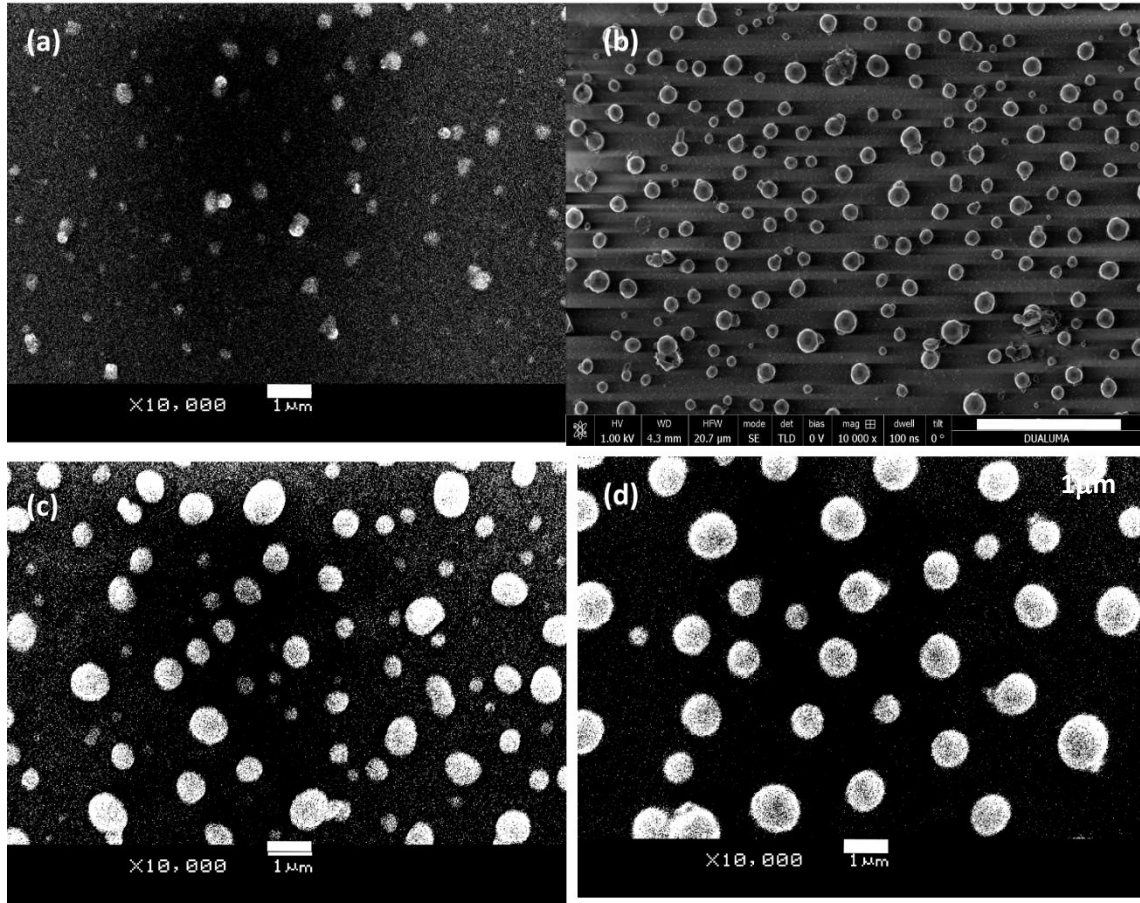

**Figure S8.** FE-SEM micrograph images of vacuum thermal evaporated silver layers with four nominal thickness values: (a)  $d_{Ag}=20$  nm, (b) 40 nm, (c) 60 nm and (d) 80 nm annealed at  $T_A= 400$  °C (by applying the temperature-time plateau region program depicted in Figure 1), with  $t_A= 1$  hour. The white bars of a),c) and d) correspond to 1  $\mu$ m, whereas the one of b) corresponds to 5  $\mu$ m.

### *Structural parameters definition.*

The texture coefficient  $TC(hkl)$  is calculated by means of the following equation [1–6]:

$$TC(hkl) = \frac{I_{(hkl)}/I_{0(hkl)}}{\left(\frac{1}{N}\right)\sum_N I_{(hkl)}/I_{0(hkl)}} \quad (1)$$

where  $I_{(hkl)}$  and  $I_{0(hkl)}$  are the intensity of the  $(hkl)$  Bragg reflection for the studied sample and for a randomly oriented sample, respectively, and  $N$  is the number of considered diffraction peaks. Basically, for randomly oriented grain samples, the texture coefficient equals 1. On the other hand, for perfectly orientated grain samples along the  $(hkl)$  direction, the texture coefficient equals  $N$  (for  $(hkl)$  planes) or 0 (for other crystallographic planes)[1–6]. In present case, only the three main cubic Ag diffraction peaks were considered ( $N=3$ ), namely (111), (200) and (222).

The Scherrer equation is presented as follows[6–8]:

$$D_c = \frac{0,95 \lambda}{\beta_{hkl} \cos \theta_{hkl}} \quad (2)$$

where  $D_c$  is the crystallite coherently scattering domain calculated from  $(hkl)$  diffraction peak,  $\lambda$  is the wavelength used (1.54 Å),  $\beta_{hkl}$  is the corrected angular line width at half-maximum intensity in radians, and  $\theta_{hkl}$  is Bragg's angle. The  $\beta_{hkl}$  parameter was corrected using the following equation:

$$\beta_{hkl} = \sqrt{\beta_{exp}^2 - \beta_{ins}^2} \quad (3)$$

where  $\beta_{exp}$  corresponds to the experimentally determined full width at half of the maximum intensity, FWHM, of the peak. The instrumental width was determined as  $\beta_{ins} = 0.14^\circ$  by using a silicon standard pattern.

#### *Determination of surface crystallography of the faceted silver nanoparticles.*

The Miller indices of the exposed facets of the silver nanoparticles have been assigned in the basis of the geometrical shapes exhibited by each of these facets and the angle between them (according to Steno's law), and a further comparison to previously published works dealing with the same geometrical model of an ideal 26-facet rhombicuboctahedron microstructure, such as the paper of Liang et al. [9].

## References

1. G.B. Harris, X. Quantitative measurement of preferred orientation in rolled uranium bars, London, Edinburgh, Dublin Philos. Mag. J. Sci. 43 (1952) 113–123. <https://doi.org/10.1080/14786440108520972>.
2. H.R. Moutinho, F.S. Hasoon, F. Abulfotuh, L.L. Kazmerski, Investigation of polycrystalline CdTe thin films deposited by physical vapor deposition, close-spaced sublimation, and sputtering, J. Vac. Sci. Technol. A. 13 (1995) 2877–2883. <https://doi.org/10.1116/1.579607>.
3. V. Consonni, G. Rey, H. Roussel, B. Doisneau, E. Blanquet, D. Bellet, Preferential orientation of fluorine-doped SnO2 thin films: The effects of growth temperature, Acta Mater. 61 (2013) 22–31. <https://doi.org/https://doi.org/10.1016/j.actamat.2012.09.006>.
4. E. A. Dalchiale, P. Giorgi, R.E. Marotti, F. Martí In, J.R. Ramos-Barrado, R. Ayouchi, D. Leinen, Electrodeposition of ZnO thin films on n-Si(1 0 0), Sol. Energy Mater. Sol. Cells. 70 (2001) 245–254. <https://doi.org/10.1002/anie.201001827>.
5. H.R. Moutinho, M.M. Al-Jassim, D.H. Levi, P.C. Dippo, L.L. Kazmerski, Effects of CdCl2 treatment on the recrystallization and electro-optical properties of CdTe thin films, J. Vac. Sci. Technol. A. 16 (1998) 1251–1257. <https://doi.org/10.1116/1.581269>.
6. G. Riveros, D. Ramírez, D.L. Gau, L. Hernández, P. Häberle, R.E. Marotti, R. Romero, A. Cuevas, F. Martín, E.A. Dalchiale, Electrodeposition of Single Phase SnS Thin Films: Effect of Electrolytic Bath Temperature on the Final Film Properties, J. Electrochem. Soc. 166 (2019) D44–D51. <https://doi.org/10.1149/2.0661902jes>.

7. P. Scherrer, Nachrichten von der Gesellschaft der Wissenschaften zu Göttingen, Math. Klasse. 2 (1918) 98–100.
8. A.L. Patterson, The Scherrer Formula for X-Ray Particle Size Determination, Phys. Rev. 56 (1939) 978–982. <https://doi.org/10.1103/PhysRev.56.978>.
9. C. Liang, S. Huang, W. Zhao, W. Liu, J. Chen, H. Liu and Y. Tong, Polyhedral Fe<sub>3</sub>O<sub>4</sub> nanoparticles for lithium ion storage, *New J. Chem.*, 39 (2015) 2651-2656.
